# Supplementary material for: Preparation of a magnetically separable CoFe2O4supported Ag nanocatalyst and its catalytic reaction towards the decolorization of a variety of dyes
Source: Royal Society of Chemistry journal article supplement (doi:10.1039/c5ra00298b), 2015-01-01
Supplement: c5ra00298b1.pdf [file c5ra00298b1.pdf]

## Electronic Supplementary Information

### **Preparation of magnetically separable $\text{CoFe}_2\text{O}_4$ supported Ag nanocatalysts and catalysis reaction towards decolorization of variety of dyes**

Bhanudas Naik<sup>a</sup>, Subhenjit Hazra<sup>b</sup>, Dayananda Desagani<sup>b</sup>, Barun Kumar Ghosh<sup>b</sup>, Manoj Kumar Patra<sup>c</sup>,  
Sampat Raj Vadera<sup>c</sup>, Narendra Nath Ghosh<sup>b\*</sup>

<sup>a</sup>Departamento de Química, Universidade Federal de Santa Maria 97119-900, Santa Maria, RS, Brazil.

<sup>b</sup>Nanomaterials Lab, Department of Chemistry, Birla Institute of Technology and Science, Pilani, K.K. Birla Goa Campus, Goa-403726, India.

<sup>c</sup>Defence Lab, Jodhpur 342011, India.

Corresponding author. Tel./fax: +91 832 2580318/2557033.

E-mail address: naren70@yahoo.com (N. N. Ghosh)

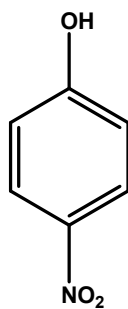

(A) 4-Nitrophenol

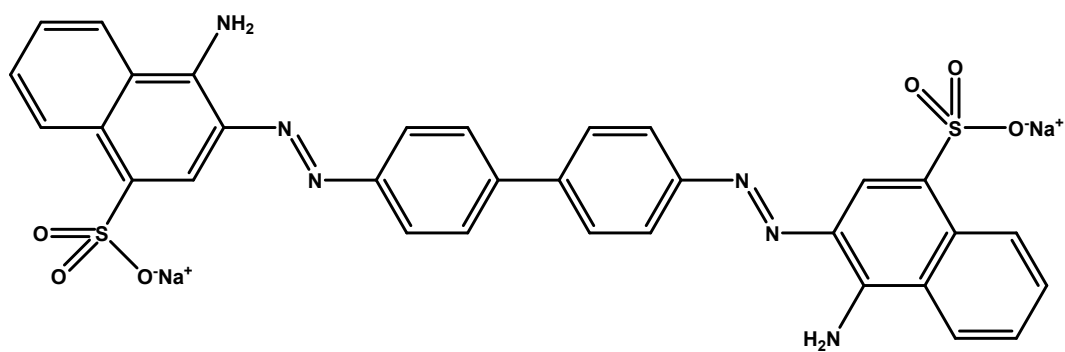

(B) Congo Red

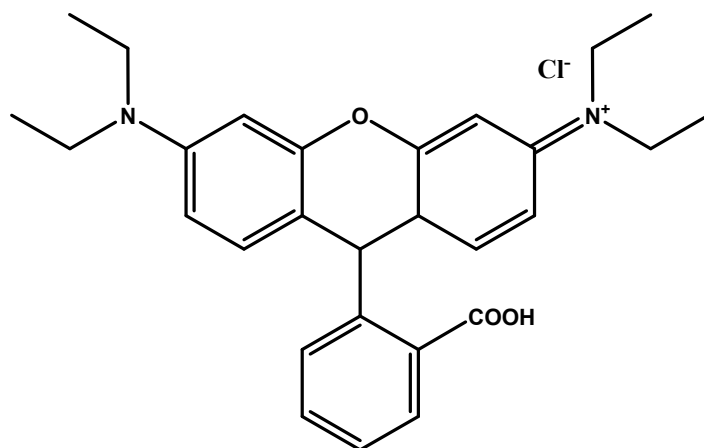

(C) Rhodamine B

**Fig. S1** Chemical structures of (A) 4-Nitrophenol, (B) Congo Red, (C) Rhodamine B

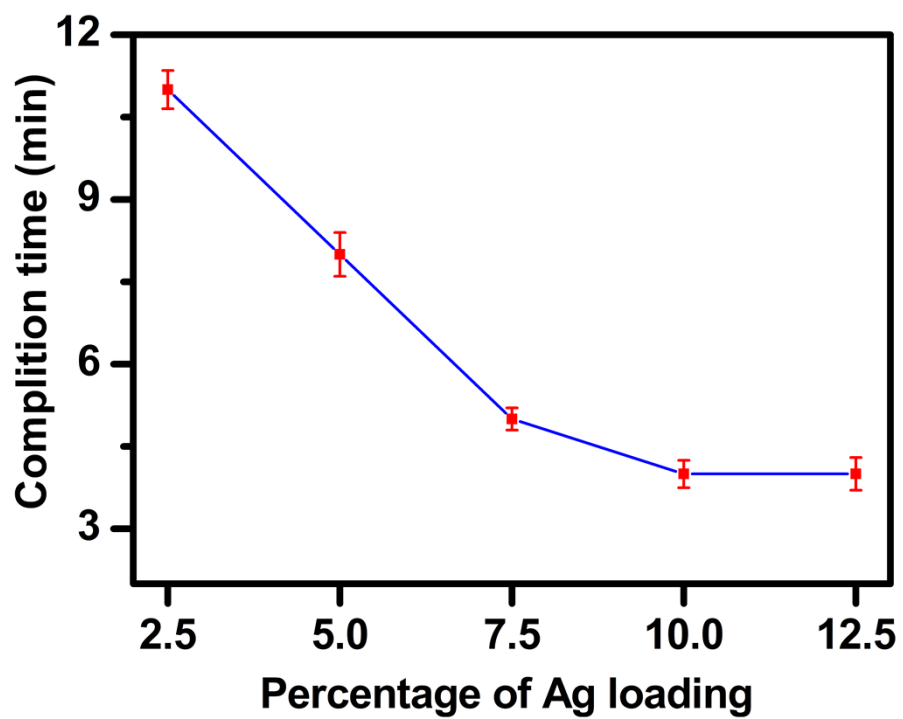

**Fig. S2** Effect of Ag nanoparticle loading percentage on time required for completion of reduction of 4-NP.

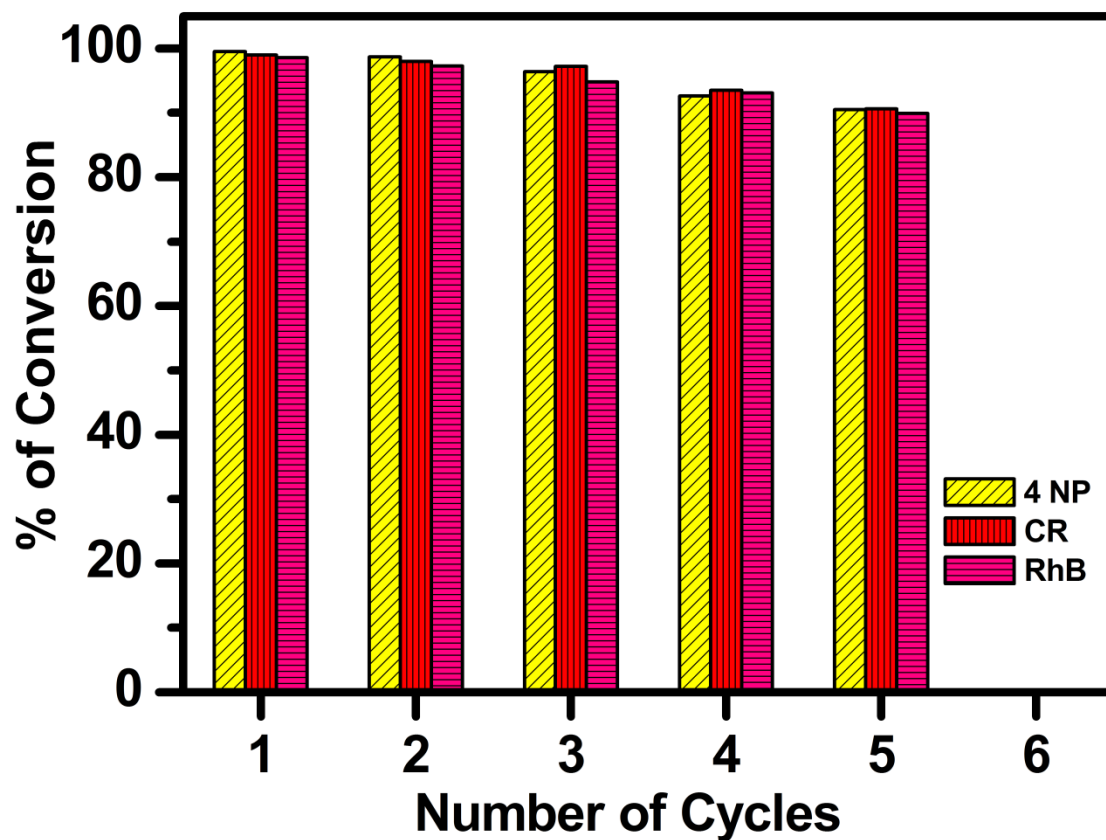

**Fig. S3** Conversion percentage of 4-NP, CR and RhB in successive uses of 10Ag@CoFe<sub>2</sub>O<sub>4</sub> catalyst.
